# Supplementary material for: Ancient DNA Suggests Single Colonization and Within-Archipelago Diversification of Caribbean Caviomorph Rodents
Source: PubMed Central journal article supplement (PMC7783164; doi:10.1093/molbev/msaa189), 2020-10-09
Supplement: msaa189_supplementary_data.pdf [file msaa189_supplementary_data.pdf]

**Table S1.** Sequencing results, including pre-target capture enrichment screening results and post-capture results. Endogenous content and enrichment factor estimated using mapping results from the whole mitochondrial genome reference sequence. Sequence data used in final analyses highlighted in green.

| Species              | Samples in final analysis | Pre-capture         |                                                                                       |                                                                                  |                       |                         | Post-capture        |                                                                                          |                                                                                    |                       |                         | Enrichment factor | % incr/ decr reads mapped |
|----------------------|---------------------------|---------------------|---------------------------------------------------------------------------------------|----------------------------------------------------------------------------------|-----------------------|-------------------------|---------------------|------------------------------------------------------------------------------------------|------------------------------------------------------------------------------------|-----------------------|-------------------------|-------------------|---------------------------|
|                      |                           | Paired merged reads | Average coverage                                                                      | Reads mapped                                                                     | Reads mapped mtgenome | Estim. endogen. content | Paired merged reads | Average coverage                                                                         | Reads mapped                                                                       | Reads mapped mtgenome | Estim. endogen. content |                   |                           |
| <i>G. thoracatus</i> | 1                         | 2,709,500           | 72.3 (mtgen)<br>0.17 (vwF)<br>0.34 (RAG1)<br>0.2 (RBP3)<br>0.39 (apoB)<br>0.38 (GHR)  | 16051 (mtgen)<br>5 (vwF)<br>7 (RAG1)<br>4 (RBP3)<br>9 (apoB)<br>8 (GHR)          | 12,927                | 0.477                   | 5,405,344           | 63.14 (mtgen)<br>1.85 (vwF)<br>2.92 (RAG1)<br>1.31 (RBP3)<br>3.76 (apoB)<br>1.92 (GHR)   | 12927 (mtgen)<br>29 (vwF)<br>46 (RAG1)<br>23 (RBP3)<br>54 (apoB)<br>23 (GHR)       | 16,051                | 0.297                   | -61%              | 19%                       |
| <i>E. obliquus</i>   | 1                         | 2,317,525           | 0.4 (mtgen)<br>0 (vwF)<br>0 (RAG1)<br>0 (RBP3)<br>0 (apoB)<br>0 (GHR)                 | 6.18E-03 (mtgen)<br>0 (vwF)<br>0 (RAG1)<br>0 (RBP3)<br>0 (apoB)<br>0 (GHR)       | 6.18E-03              | 2.67E-07                | 4,426,535           | 0.45 (mtgen)<br>2.88 (vwF)<br>1.47 (RAG1)<br>2.9 (RBP3)<br>0.3 (apoB)<br>0.86 (GHR)      | 261 (mtgen)<br>146 (vwF)<br>71 (RAG1)<br>157 (RBP3)<br>16 (apoB)<br>31 (GHR)       | 261                   | 0.006                   | 100%              | 100%                      |
|                      |                           | 13,172,455          | 4.13 (mtgen)<br>2.07 (vwF)<br>1.41 (RAG1)<br>1.79 (RBP3)<br>0.59 (apoB)<br>1.07 (GHR) | 3764 (mtgen)<br>132 (vwF)<br>845 (RAG1)<br>230 (RBP3)<br>378 (apoB)<br>490 (GHR) | 3764                  | 0.029                   | 63,079,541          | 4.89 (mtgen)<br>20.71 (vwF)<br>14.15 (RAG1)<br>17.9 (RBP3)<br>5.91 (apoB)<br>10.72 (GHR) | 4135 (mtgen)<br>1324 (vwF)<br>845 (RAG1)<br>1230 (RBP3)<br>378 (apoB)<br>490 (GHR) | 4135                  | 0.007                   | -336%             | 9%                        |



| Species                 | Samples in final analysis | Pre-capture         |                                                                                    |                                                                               |                       |                         | Post-capture        |                                                                                       |                                                                                 |                       |                         | Enrichment factor | % incr/ decr reads mapped |
|-------------------------|---------------------------|---------------------|------------------------------------------------------------------------------------|-------------------------------------------------------------------------------|-----------------------|-------------------------|---------------------|---------------------------------------------------------------------------------------|---------------------------------------------------------------------------------|-----------------------|-------------------------|-------------------|---------------------------|
|                         |                           | Paired merged reads | Average coverage                                                                   | Reads mapped                                                                  | Reads mapped mtgenome | Estim. endogen. content | Paired merged reads | Average coverage                                                                      | Reads mapped                                                                    | Reads mapped mtgenome | Estim. endogen. content |                   |                           |
| <i>G. columbianus</i>   | 1                         | 3,762,236           | 1.56 (mtgen)<br>6.67 (vwF)<br>3.27 (RAG1)<br>6.49 (RBP3)<br>0.86 (apoB)<br>0 (GHR) | 1112 (mtgen)<br>447 (vwF)<br>186 (RAG1)<br>410 (RBP3)<br>57 (apoB)<br>0 (GHR) | 1112                  | 0.030                   | 78,429,431          | 2.33 (mtgen)<br>6.95 (vwF)<br>5.03 (RAG1)<br>8.02 (RBP3)<br>0.82 (apoB)<br>3.87 (GHR) | 3363 (mtgen)<br>396 (vwF)<br>281 (RAG1)<br>505 (RBP3)<br>51 (apoB)<br>160 (GHR) | 3363                  | 0.004                   | -589%             | 67%                       |
|                         |                           | 3,451,270           | 0.04 (mtgen)<br>0.69 (vwF)<br>0.10 (RAG1)<br>0.44 (RBP3)<br>0.16 (apoB)<br>0 (GHR) | 23 (mtgen)<br>21 (vwF)<br>6 (RAG1)<br>26 (RBP3)<br>4 (apoB)<br>0 (GHR)        | 23                    | 0.001                   | 40,120,287          | 0.07 (mtgen)<br>0.37 (vwF)<br>0.11 (RAG1)<br>0.02 (RBP3)<br>0.39 (apoB)<br>0.08 (GHR) | 109 (mtgen)<br>39 (vwF)<br>23 (RAG1)<br>2 (RBP3)<br>25 (apoB)<br>3 (GHR)        | 109                   | 2.00E-04                | -145%             | 79%                       |
| <i>I. portoricensis</i> | 0                         | 137,018             | 0.04 (mtgen)<br>0 (vwF)<br>0 (RAG1)<br>0 (RBP3)<br>0 (apoB)<br>0 (GHR)             | 14 (mtgen)<br>0 (vwF)<br>0 (RAG1)<br>0 (RBP3)<br>0 (apoB)<br>0 (GHR)          | 14                    | 0.010                   | —                   | —                                                                                     | —                                                                               | —                     | —                       | —                 | —                         |

**Table S2.** Full details of final coverages of mitochondrial genomes and nuclear genes sequenced from extinct Caribbean caviomorphs.

| <b>Species</b>        | <b>Gene</b>          | <b>Missing data (bp)</b> | <b>Frequency (%)</b> | <b>GC content %</b> | <b>Sequence length (bp)</b> |
|-----------------------|----------------------|--------------------------|----------------------|---------------------|-----------------------------|
| <i>B. offella</i>     | mitochondrial genome | 1,721                    | 11.00                | 35.5                | 15,912                      |
|                       | vWF                  | 241                      | 37.60                | 61                  | 809                         |
| <i>B. voratus</i>     | mitochondrial genome | 1,545                    | 8.20                 | 38.6                | 15,912                      |
|                       | vWF                  | 8                        | 1.40                 | 61.1                | 809                         |
|                       | RAG1                 | 32                       | 3.00                 | 53.2                | 1,073                       |
|                       | apoB                 | 32                       | 2.80                 | 39.1                | 1,151                       |
|                       | GHR                  | 19                       | 2.20                 | 49                  | 842                         |
| <i>E. obliquus</i>    | mitochondrial genome | 1,666                    | 8.40                 | 38.9                | 15,912                      |
|                       | vWF                  | 23                       | 2.80                 | 59.8                | 809                         |
|                       | RAG1                 | 31                       | 2.90                 | 53.2                | 1,073                       |
|                       | RBP3                 | 30                       | 4.00                 | 61.7                | 753                         |
|                       | apoB                 | 45                       | 3.90                 | 39.4                | 1,151                       |
|                       | GHR                  | 43                       | 5.10                 | 49.7                | 842                         |
| <i>G. columbianus</i> | mitochondrial genome | 5,462                    | 29.50                | 39.1                | 15,912                      |
|                       | vWF                  |                          |                      |                     |                             |
|                       | RAG1                 | 682                      | 63.70                | 64.5                | 1,073                       |
|                       | RBP3                 | 148                      | 12.40                | 63.6                | 753                         |
|                       | GHR                  | 293                      | 36.10                | 50.9                | 842                         |
| <i>G. thoracatus</i>  | mitochondrial genome | 272                      | 1.80                 | 35.8                | 15,912                      |
|                       | RAG1                 | 0                        | 0.00                 | 52.4                | 1,073                       |
|                       | RBP3                 | 13                       | 1.00                 | 61.7                | 753                         |
|                       | apoB                 | 3                        | 0.30                 | 39.3                | 1,151                       |
|                       | GHR                  | 21                       | 2.60                 | 50.8                | 842                         |

**Table S3.** Estimated divergence dates for numbered and lettered nodes in time-calibrated caviomorph phylogeny shown in Figure 3.

| Node      | Mean estimated divergence date (Mya) | 95% HPD (Mya) | Node      | Mean estimated divergence date (Mya) | 95% HPD (Mya) |
|-----------|--------------------------------------|---------------|-----------|--------------------------------------|---------------|
| <b>1</b>  | 33.87                                | 16.1, 42.1    | <b>27</b> | 3.52                                 | 2.0, 4.9      |
| <b>2</b>  | 28.58                                | 6.3, 37.7     | <b>28</b> | 14.55                                | 11.7, 17.1    |
| <b>3</b>  | 24.36                                | 4.2, 35.2     | <b>29</b> | 10.28                                | 7.0, 13.0     |
| <b>4</b>  | 23.94                                | 21, 27.5      | <b>30</b> | 8.61                                 | 5.5, 11.5     |
| <b>5</b>  | 19.36                                | 7.3, 23.0     | <b>31</b> | 7.46                                 | 4.7, 10.3     |
| <b>6</b>  | 11.65                                | 4.9, 16.1     | <b>32</b> | 15.63                                | 6.9, 12.9     |
| <b>7</b>  | 7.34                                 | 2.9, 11.4     | <b>33</b> | 10.36                                | 7.0, 13.4     |
| <b>8</b>  | 20.04                                | 18.1, 22.4    | <b>34</b> | 2.70                                 | 1.3, 4.2      |
| <b>9</b>  | 19.49                                | 17.7, 21.7    | <b>35</b> | 15.43                                | 9.2, 18.5     |
| <b>10</b> | 18.02                                | 10, 21.2      | <b>36</b> | 14.47                                | 8.1, 17.4     |
| <b>11</b> | 14.13                                | 7.6, 17.4     | <b>37</b> | 10.21                                | 5.5, 12.9     |
| <b>12</b> | 12.58                                | 6.6, 15.8     | <b>38</b> | 7.39                                 | 3.9, 9.9      |
| <b>13</b> | 9.64                                 | 4.7, 13.1     | <b>39</b> | 5.24                                 | 2.6, 7.5      |
| <b>14</b> | 9.00                                 | 4.7, 13       | <b>40</b> | 13.21                                | 7.4, 16.4     |
| <b>15</b> | 7.04                                 | 2.9, 9.7      | <b>41</b> | 18.08                                | 9.9, 21.7     |
| <b>16</b> | 8.22                                 | 4.1, 11.9     | <b>42</b> | 12.05                                | 7.1, 15.1     |
| <b>17</b> | 18.27                                | 15.8, 20.3    | <b>43</b> | 11.20                                | 7.1, 15.1     |
| <b>18</b> | 16.81                                | 15.8 18.3     | <b>44</b> | 10.42                                | 6.7, 14.1     |
| <b>19</b> | 15.57                                | 14.1, 17.6    | <b>45</b> | 6.37                                 | 3.4, 8.8      |
| <b>20</b> | 13.47                                | 11.5, 15.6    | <b>46</b> | 7.50                                 | 6.4, 13.3     |
| <b>21</b> | 9.79                                 | 6.5, 12.4     | <b>47</b> | 3.43                                 | 1.6, 4.6      |
| <b>22</b> | 11.00                                | 8.8, 13.4     | <b>48</b> | 2.26                                 | 1.2, 3.2      |
| <b>23</b> | 9.98                                 | 7.5, 12.1     | <b>49</b> | 1.45                                 | 0.6, 2.2      |
| <b>24</b> | 6.46                                 | 4.4, 8.3      | <b>50</b> | 5.67                                 | 2.8, 7.6      |
| <b>25</b> | 5.61                                 | 3.7, 7.4      | <b>51</b> | 3.39                                 | 1.4, 4.9      |
| <b>26</b> | 4.90                                 | 3.1, 6.6      |           |                                      |               |

**Table S4.** Genes used to generate baits for capture enrichment.

| <b>Gene</b>                                | <b>Length<br/>(bp)</b> | <b>NCBI<br/>accession</b> | <b>Species</b>                   |
|--------------------------------------------|------------------------|---------------------------|----------------------------------|
| apolipoprotein B (apoB)                    | 1155                   | JX515310.1                | <i>Proechimys quadruplicatus</i> |
| recombination activating gene 1 (RAG1)     | 1072                   | EU313333.1                | <i>Proechimys simonsi</i>        |
| von Willebrand factor (vWF)                | 1150                   | AJ849311.1                | <i>Echimys didelphoides</i>      |
| interphotoreceptor retinoid binding (RBP3) | 1245                   | JF297775.1                | <i>Phyllomys</i> sp.             |
| growth hormone receptor (GHR)              | 798                    | JX515330.1                | <i>Trinomys setosus</i>          |
| mitochondrial genome                       | 16816                  | HM544128.1                | <i>Proechimys longicaudatus</i>  |

**Table S5.** Sequence data used in post-sequencing data processing as reference sequences in read mappings.

| Gene                 | Species                           | NCBI accession number |
|----------------------|-----------------------------------|-----------------------|
| mitochondrial genome | <i>Plagiodontia aedium</i>        | KU892771.1            |
|                      | <i>Mysateles prehensilis</i>      | KU892770.1            |
|                      | <i>Chinchilla lanigera</i>        | NC021386.1            |
|                      | <i>Carterodon sulcidens</i>       | KU892752.1            |
|                      | <i>Capromys pilorides</i>         | KU892766.1            |
|                      | <i>Proechimys longicaudatus</i>   | NC020657.1            |
|                      | <i>Geocapromys brownii</i>        | KU892767.1            |
|                      | <i>Mesocapromys melanurus</i>     | KU892769.1            |
| GHR                  | <i>Trinomys paratus</i>           | JX515330.1            |
|                      | <i>Capromys pilorides</i>         | AF433950.1            |
|                      | <i>Geocapromys brownii</i>        | KM013984.1            |
|                      | <i>Geocapromys ingrahami</i>      | KM013985.1            |
|                      | <i>Mesocapromys auritus</i>       | KJ742633.1            |
|                      | <i>Mesocapromys angelcabrerai</i> | KJ742632.1            |
|                      | <i>Mysateles prehensilis</i>      | KJ742634.1            |
| RAG1                 | <i>Proechimys simonsi</i>         | EU313333.1            |
|                      | <i>Capromys pilorides</i>         | JN633628.1            |
|                      | <i>Geocapromys ingrahami</i>      | KM013990.1            |
|                      | <i>Geocapromys brownii</i>        | KM013989.1            |
|                      | <i>Mesocapromys angelcabrerai</i> | KJ742694.1            |
|                      | <i>Mesocapromys auritus</i>       | KJ742693.1            |
|                      | <i>Mesocapromys melanurus</i>     | KJ742691.1            |
|                      | <i>Mysateles prehensilis</i>      | KJ742696.1            |
| RBP3                 | <i>Phyllomys sp.</i>              | JF297775.1            |
|                      | <i>Capromys pilorides</i>         | KM013993.1            |
|                      | <i>Geocapromys ingrahami</i>      | KM013995.1            |
| apoB                 | <i>Proechimys quadruplicatus</i>  | JX515310.1            |
| vWF                  | <i>Echimys didelphoides</i>       | AJ849311.1            |
|                      | <i>Capromys pilorides</i>         | AJ251142.1            |
|                      | <i>Geocapromys ingrahami</i>      | KM014000.1            |
|                      | <i>Geocapromys brownii</i>        | KM013999.1            |
|                      | <i>Mesocapromys auritus</i>       | KJ742623.1            |
|                      | <i>Mesocapromys angelcabrerai</i> | KJ742622.1            |

**Table S6.** Results of reads-mapping analysis conducted in CLC Workbench v.8 for iterative consensus sequence generation.

| Species                        | Mapping parameters      | Reference sequence      | Total reads mapped | Average coverage |
|--------------------------------|-------------------------|-------------------------|--------------------|------------------|
| <i>Geocapromys columbianus</i> | M1                      | <i>G. ingrahami</i>     | 124                | 0.21             |
|                                |                         | <i>M. prehensilis</i>   | 34                 | 0.06             |
|                                |                         | <i>P. aedium</i>        | 25                 | 0.05             |
|                                |                         | <i>P. longicaudatus</i> | 43                 | 0.04             |
|                                | M                       | <i>G. ingrahami</i>     | 450                | 0.55             |
|                                |                         | <i>M. prehensilis</i>   | 337                | 0.75             |
|                                |                         | <i>P. aedium</i>        | 357                | 0.75             |
|                                |                         | <i>P. longicaudatus</i> | 293                | 0.34             |
|                                | L                       | <i>G. ingrahami</i>     | 679                | 1.78             |
|                                |                         | <i>M. prehensilis</i>   | 360                | 0.7              |
|                                |                         | <i>P. aedium</i>        | 560                | 1.03             |
|                                |                         | <i>P. longicaudatus</i> | 618                | 1.17             |
| <i>Geocapromys thoracatus</i>  | XH                      | <i>G. ingrahami</i>     | 5987               | 16.89            |
|                                |                         | <i>M. prehensilis</i>   | 1387               | 3.42             |
|                                |                         | <i>P. aedium</i>        | 937                | 2.16             |
|                                |                         | <i>P. longicaudatus</i> | 432                | 0.91             |
|                                | H1                      | <i>G. ingrahami</i>     | 20573              | 82.3             |
|                                |                         | <i>M. prehensilis</i>   | 3592               | 10.73            |
|                                |                         | <i>P. aedium</i>        | 2260               | 6.23             |
|                                |                         | <i>P. longicaudatus</i> | 1156               | 2.82             |
|                                | H                       | <i>G. ingrahami</i>     | 30958              | 131.89           |
|                                |                         | <i>M. prehensilis</i>   | 5744               | 18.55            |
|                                |                         | <i>P. aedium</i>        | 3967               | 12.24            |
|                                |                         | <i>P. longicaudatus</i> | 2559               | 7.47             |
|                                | M1                      | <i>G. ingrahami</i>     | 33131              | 140.26           |
|                                |                         | <i>M. prehensilis</i>   | 6492               | 21.42            |
|                                |                         | <i>P. aedium</i>        | 5226               | 17.3             |
|                                |                         | <i>P. longicaudatus</i> | 3914               | 12.67            |
| M                              | <i>G. ingrahami</i>     | 34067                   | 143.05             |                  |
|                                | <i>M. prehensilis</i>   | 6847                    | 22.43              |                  |
|                                | <i>P. aedium</i>        | 5765                    | 19.22              |                  |
|                                | <i>P. longicaudatus</i> | 4877                    | 16.33              |                  |
| L                              | <i>G. ingrahami</i>     | 37001                   | 148.4              |                  |
|                                | <i>M. prehensilis</i>   | 8653                    | 25.06              |                  |
|                                | <i>P. aedium</i>        | 7889                    | 21.96              |                  |
|                                | <i>P. longicaudatus</i> | 7592                    | 19.73              |                  |
| <i>Elasmodontomys obliquus</i> | H                       | <i>G. ingrahami</i>     | 39                 | 0.05             |
|                                |                         | <i>M. prehensilis</i>   | 25                 | 0.04             |
|                                |                         | <i>P. aedium</i>        | 52                 | 0.07             |
|                                |                         | <i>P. longicaudatus</i> | 43                 | 0.05             |



|                         |    |                         |      |       |
|-------------------------|----|-------------------------|------|-------|
|                         |    | <i>G. ingrahami</i>     | 149  | 0.18  |
|                         | M1 | <i>M. prehensilis</i>   | 123  | 0.15  |
|                         |    | <i>P. aedium</i>        | 196  | 0.25  |
|                         |    | <i>P. longicaudatus</i> | 194  | 0.22  |
|                         | M  | <i>G. ingrahami</i>     | 345  | 0.42  |
|                         |    | <i>M. prehensilis</i>   | 292  | 0.36  |
|                         |    | <i>P. aedium</i>        | 450  | 0.56  |
|                         |    | <i>P. longicaudatus</i> | 471  | 0.53  |
|                         | L  | <i>G. ingrahami</i>     | 4429 | 4.87  |
|                         |    | <i>M. prehensilis</i>   | 3657 | 3.99  |
|                         |    | <i>P. aedium</i>        | 5374 | 6     |
|                         |    | <i>P. longicaudatus</i> | 5734 | 5.92  |
|                         | H1 | <i>G. ingrahami</i>     | 377  | 1     |
|                         |    | <i>M. prehensilis</i>   | 383  | 1.1   |
|                         |    | <i>P. aedium</i>        | 387  | 1.05  |
|                         |    | <i>P. longicaudatus</i> | 191  | 0.46  |
|                         | H  | <i>G. ingrahami</i>     | 1038 | 3.08  |
|                         |    | <i>M. prehensilis</i>   | 990  | 2.91  |
|                         |    | <i>P. aedium</i>        | 1310 | 3.9   |
|                         |    | <i>P. longicaudatus</i> | 551  | 1.51  |
| <i>Brotomys voratus</i> | M1 | <i>G. ingrahami</i>     | 1595 | 4.99  |
|                         |    | <i>M. prehensilis</i>   | 1525 | 4.72  |
|                         |    | <i>P. aedium</i>        | 2211 | 7.23  |
|                         |    | <i>P. longicaudatus</i> | 1056 | 3.16  |
|                         | M  | <i>G. ingrahami</i>     | 1961 | 6.12  |
|                         |    | <i>M. prehensilis</i>   | 1869 | 5.62  |
|                         |    | <i>P. aedium</i>        | 2747 | 8.89  |
|                         |    | <i>P. longicaudatus</i> | 1490 | 4.27  |
|                         | L  | <i>G. ingrahami</i>     | 6421 | 11.31 |
|                         |    | <i>M. prehensilis</i>   | 6313 | 11.05 |
|                         |    | <i>P. aedium</i>        | 9413 | 16.86 |
|                         |    | <i>P. longicaudatus</i> | 8761 | 12.23 |
|                         | H1 | <i>G. ingrahami</i>     | 325  | 0.75  |
|                         |    | <i>M. prehensilis</i>   | 238  | 0.54  |
|                         |    | <i>P. aedium</i>        | 453  | 1.06  |
|                         |    | <i>P. longicaudatus</i> | 224  | 0.48  |
| <i>Boromys offella</i>  | H  | <i>G. ingrahami</i>     | 835  | 2     |
|                         |    | <i>M. prehensilis</i>   | 599  | 1.46  |
|                         |    | <i>P. aedium</i>        | 1236 | 3.07  |
|                         |    | <i>P. longicaudatus</i> | 626  | 1.42  |
|                         | M1 | <i>G. ingrahami</i>     | 1229 | 3     |
|                         |    | <i>M. prehensilis</i>   | 878  | 2.16  |
|                         |    | <i>P. aedium</i>        | 1815 | 4.63  |
|                         |    | <i>P. longicaudatus</i> | 1043 | 2.44  |
|                         | M  | <i>G. ingrahami</i>     | 1534 | 3.63  |

---

|   |                         |      |       |
|---|-------------------------|------|-------|
|   | <i>M. prehensilis</i>   | 1097 | 2.59  |
|   | <i>P. aedium</i>        | 2197 | 5.35  |
|   | <i>P. longicaudatus</i> | 1432 | 3.19  |
|   | <i>G. ingrahami</i>     | 6025 | 8.53  |
| L | <i>M. prehensilis</i>   | 5223 | 7.16  |
|   | <i>P. aedium</i>        | 8387 | 12.13 |
|   | <i>P. longicaudatus</i> | 8587 | 10.56 |

---

**Table S7.** Mapping parameters used in CLC Workbench.

| Mapping parameter | Length fraction | Similarity fraction |
|-------------------|-----------------|---------------------|
| default           | 0.5             | 0.8                 |
| L                 | 0.7             | 0.7                 |
| M                 | 0.8             | 0.8                 |
| M1                | 0.85            | 0.85                |
| H                 | 0.9             | 0.9                 |
| H1                | 0.95            | 0.95                |
| XH                | 1               | 1                   |

**Table S8.** Echimyid outgroup taxa for whole mitochondrial genome and nuclear genes.

| Species                           | GenBank accession number |            |            |            |            |            |
|-----------------------------------|--------------------------|------------|------------|------------|------------|------------|
|                                   | mitogenome               | apoB       | RBP3       | GHR        | RAG1       | vWF        |
| <i>Callistomys pictus</i>         | KU892754                 | KY303652.1 | KY303656.1 | KY303654.1 | KY303658.1 | KJ742614.1 |
| <i>Capromys pilorides</i>         | KU892766                 | KM013977   | KM013993   | KM013983   | JX515322   | KM013998   |
| <i>Carterodon sulcidens</i>       | KU892752                 | KY303653   | KY303657   | KY303655   | KJ742678   | —          |
| <i>Cavia porcellus</i>            | NC_000884.1              | AJ399524   | AJ427248   | AF433930   | JN414957   | AJ224663   |
| <i>Chinchilla lanigera</i>        | NC_021386.1              | —          | AF297280   | AF332036   | KF590658.1 | AJ238385.1 |
| <i>Clyomys laticeps</i>           | KU892753                 | JX515304   | JX515316   | JX515326   | —          | AJ849306   |
| <i>Coendou</i> sp.                | NC_021387.1              | —          | —          | —          | —          | —          |
| <i>Ctenomys</i> sp.               | HM544130.1               | JN414055.1 | JN414816.1 | FJ855214.1 | JN414961.1 | JN415078.1 |
| <i>Dactylomys</i> sp.             | KU762015                 | —          | —          | KF590681.1 | EU313300.1 | KF590667.1 |
| <i>Echimyus chrysurus</i>         | KU892781                 | JX515301   | AJ427247   | JX515533   | EU313303   | AJ251141   |
| <i>Euryzgomatomys spinosus</i>    | KU892755                 | —          | JX515315   | JX515327   | KJ742680   | AJ849319   |
| <i>Geocapromys brownii</i>        | KU892767                 | KM013978   | —          | KJ742644   | KJ742692   | KJ742621   |
| <i>Geocapromys ingrahami</i>      | KU892768                 | KM013979   | KM013995   | KM013985   | KM013990   | KM014000   |
| <i>Hoplomys gymnurus</i>          | KU892779                 | —          | —          | JN414758   | JN633632   | JN415080   |
| <i>Isothrix sinnamariensis</i>    | KU892785                 | JX515309   | —          | KF590685   | EU313312   | AJ849309   |
| <i>Kannabateomys amblyonyx</i>    | KU892775                 | —          | —          | —          | —          | AJ849310.1 |
| <i>Lonchothrix emiliae</i>        | KU892786                 | —          | —          | —          | —          | —          |
| <i>Makalata didelphoides</i>      | KU892782                 | JX515303   | JF297756   | JX515332   | EU313314   | AJ849311   |
| <i>Mesocapromys melanurus</i>     | KU892769                 | —          | —          | —          | KJ742691   | —          |
| <i>Mesomys hispidus</i>           | KU892787                 | JX515305   | —          | JX515335   | EU313322   | KF590671   |
| <i>Mesomys stimulax</i>           | KU892788                 | —          | —          | KJ742630.1 | KJ742674.1 | KJ742618.1 |
| <i>Myocastor coypus</i>           | KU892780                 | JX515307   | JN414814   | —          | JN414955   | AJ251140   |
| <i>Mysateles prehensilis</i>      | KU892770                 | KM013980   | —          | —          | —          | —          |
| <i>Octodon lunatus/degus</i>      | HM544134.1               | —          | AM050863   | —          | KJ742676   | AJ238386   |
| <i>Olallamys albicauda</i>        | KU892774                 | —          | —          | KF590691.1 | —          | KF590673.1 |
| <i>Pattonomys semivillosus</i>    | KU892783                 | —          | —          | —          | KJ742687.1 | KJ742616.1 |
| <i>Phyllomys blainvillii</i>      | KU892756                 | JX515302   | JF297781   | JX515331   | JX515323   | AJ849314   |
| <i>Phyllomys dasythrix</i>        | KU892757                 | —          | JF297757.1 | KJ742641.1 | KJ742689.1 | JF297709.1 |
| <i>Phyllomys lundii</i>           | KU892758                 | —          | JF297770.1 | —          | —          | JF297721.1 |
| <i>Phyllomys mantiqueirensis</i>  | KU892759                 | —          | JF297769.1 | —          | —          | JF297720.1 |
| <i>Phyllomys pattoni</i>          | KU892760                 | —          | JF297803   | KJ742642   | KJ742690   | JF297754   |
| <i>Plagiodontia aedium</i>        | KU892771                 | KM013981   | KM013996   | KM013986   | KM013991   | KM014002   |
| <i>Proechimys cuvieri</i>         | KU892778                 | —          | JX515318.1 | KF590693.1 | KF590665.1 | KF590675.1 |
| <i>Proechimys longicaudatus</i>   | HM544128.1               | —          | —          | FJ855217   | KJ742681   | KJ742619   |
| <i>Proechimys roberti</i>         | KU892772                 | —          | —          | —          | —          | —          |
| <i>Santamartamys rufodorsalis</i> | KU892777                 | —          | —          | —          | —          | —          |
| <i>Spalacopus cyanus</i>          | HM544133.1               | —          | —          | —          | —          | —          |
| <i>Thrichomys apereoides</i>      | KU892773                 | —          | JX515319   | JX515325   | EU313334   | KY303660   |
| <i>Toromys grandis</i>            | KU892784                 | —          | —          | KF590694.1 | EU313336.1 | KF590676.1 |
| <i>Trinomys albispinus</i>        | KU892761                 | KM013982   | KM013997   | KM013987   | KM013992   | KM014003   |
| <i>Trinomys dimidiatus</i>        | JX312694.1               | —          | —          | —          | KJ742682.1 | KJ742620.1 |
| <i>Trinomys iheringi</i>          | KU892762                 | —          | —          | KF590695   | EU313337   | KF590677   |
| <i>Trinomys paratus</i>           | KU892763                 | JX515306   | JX515320   | JX515330   | —          | AJ849316   |
| <i>Trinomys setosus</i>           | KU892764                 | —          | —          | JX515329   | —          | AJ849317   |
| <i>Trinomys yonenagae</i>         | KU892765                 | KM013982   | —          | JX515328   | —          | AJ849318   |
| <i>Tympanoctomys barrerae</i>     | HM544132.1               | —          | —          | KX646530.1 | —          | —          |

**Table S9.** Substitution models chosen for partitioned dataset.

| <b>Subset</b>                                     | <b>Best model</b> | <b>Subset Partitions</b>                                                                                            |
|---------------------------------------------------|-------------------|---------------------------------------------------------------------------------------------------------------------|
| <b>Mitochondrial genome</b>                       |                   |                                                                                                                     |
| 1                                                 | GTR+G             | rrnL, rrnS, trnC, trnD, trnF, trnH, trnI, trnK, trnL1, trnL2, trnM, trnN, trnP, trnQ, trnR, trnS2, trnV, trnW, trnY |
| 2                                                 | GTR+G             | atp6, atp8, cob, cox3, nad1, nad2, nad3, nad4a, nad4l, nad5, nad6                                                   |
| 3                                                 | GTR+G             | cox1, cox2, trnA, trnE, trnG, trnS1, trnT                                                                           |
| <b>apoB (apolipoprotein B)</b>                    |                   |                                                                                                                     |
| 1                                                 | HKY+G             | Gene                                                                                                                |
| <b>RAG1 (recombination activating gene 1)</b>     |                   |                                                                                                                     |
| 1                                                 | K80+G             | Gene                                                                                                                |
| <b>vWF (von Willebrand factor)</b>                |                   |                                                                                                                     |
| 1                                                 | K80+G             | Gene                                                                                                                |
| <b>RBP3 (interphotoreceptor retinoid binding)</b> |                   |                                                                                                                     |
| 1                                                 | HKY+G             | Gene                                                                                                                |
| <b>GHR (growth hormone receptor)</b>              |                   |                                                                                                                     |
| 1                                                 | K80+G             | Gene                                                                                                                |

**Table S10.** Fossil constraints and priors used in divergence dating analysis.

| <b>Node</b>                                                    | <b>Fossil and Deposit Locality</b>                                                                                    | <b>Age (Ma)</b> | <b>Prior distribution</b>                                     |
|----------------------------------------------------------------|-----------------------------------------------------------------------------------------------------------------------|-----------------|---------------------------------------------------------------|
| Cavioidea–Erethizontoidea                                      | Minimum: <i>Andemys termasi</i><br>(Tinguirirican)<br>Maximum: <i>Canaanimys</i> and <i>Cachiyacuy</i><br>(Barrancan) | 31.3–45.9       | logNormalPrior<br>mean="5.4"<br>stdev="0.8"<br>offset="31.3"  |
| Octodontidae                                                   | Minimum: <i>Pseudoplateomys innominatus</i><br>(Huayquerian)<br>Maximum: <i>Acarechimys</i><br>(Laventan)             | 6.8–11.8        | logNormalPrior<br>mean="1.846"<br>stdev="0.8"<br>offset="6.0" |
| <i>Trinomys</i> and <i>Clyomys</i> +<br><i>Euryzygomatomys</i> | <i>Theridomysops parvulus</i><br>(Huayquerian)                                                                        | 6.0–11.8        | logNormalPrior<br>mean="2.141"<br>stdev="0.8"<br>offset="6.0" |
| Echimyini                                                      | <i>Maruchito trilofodonte</i><br>(Colloncuran)                                                                        | 15.7–24.2       | logNormalPrior<br>mean="4.15"<br>stdev="0.8"<br>offset="15.7" |
| Myocastorini                                                   | <i>Pampamys emmonsae</i><br>(Huayquerian)                                                                             | 6.0–11.8        | logNormalPrior<br>mean="2.141"<br>stdev="0.8"<br>offset="6.0" |

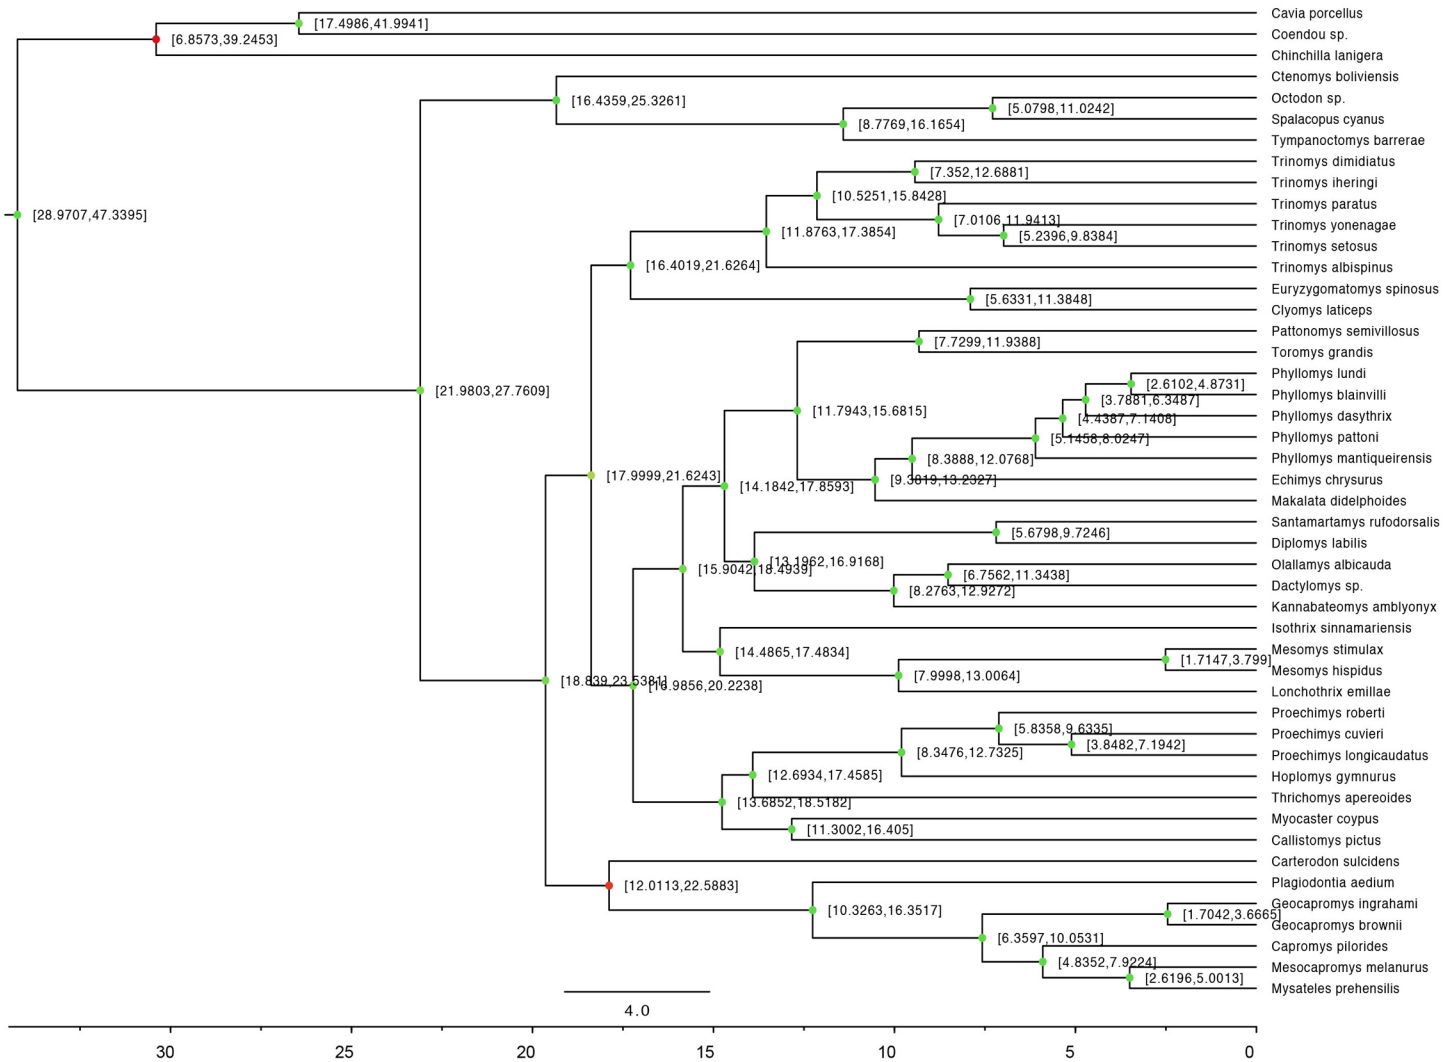

**Figure S1.** Time-calibrated phylogeny showing estimated divergence dates for Caribbean caviomorphs and mainland Neotropical caviomorphs, excluding extinct taxa. Node colours represent posterior probabilities (red <math>< 1</math>, green = 1). Numbered nodes include 95% error estimates for divergence dates in brackets.

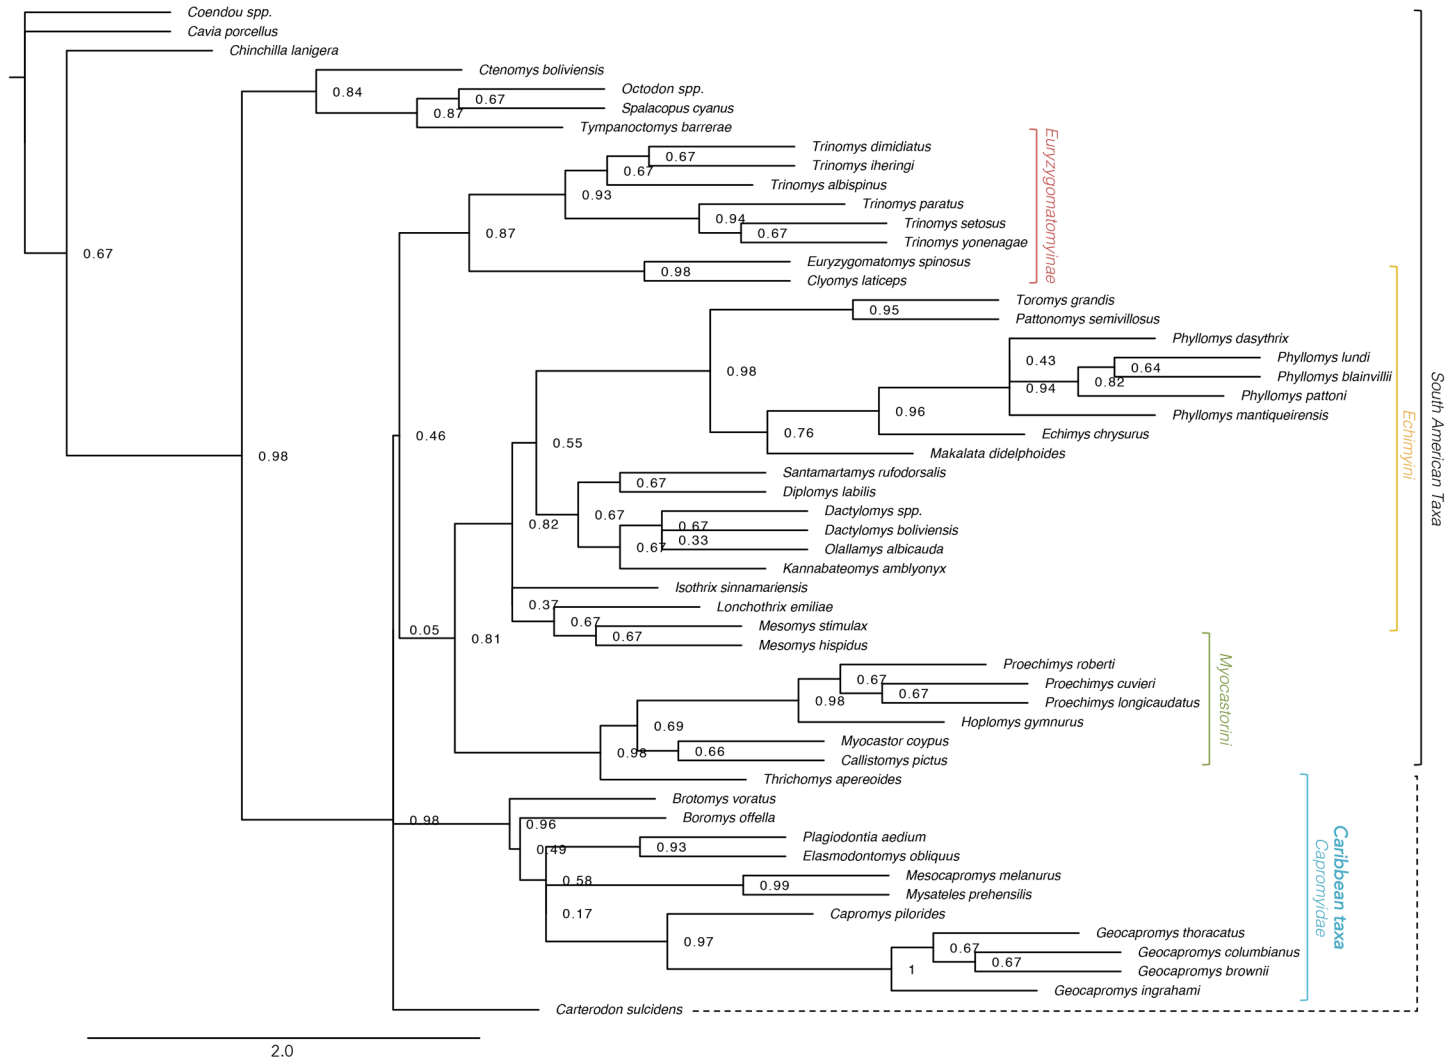

**Figure S2.** Coalescent species tree inferred using six gene trees. Node values represent the local posterior probability. Normalised quartet score = 0.8. Main clades are colour-coded and named.
